# Supplementary material
Source: Springer Nature journal article supplement (https://www.springermedizin.de/resource/supplementary/12889_2010_2889_MOESM6_ESM.pdf/9487566)

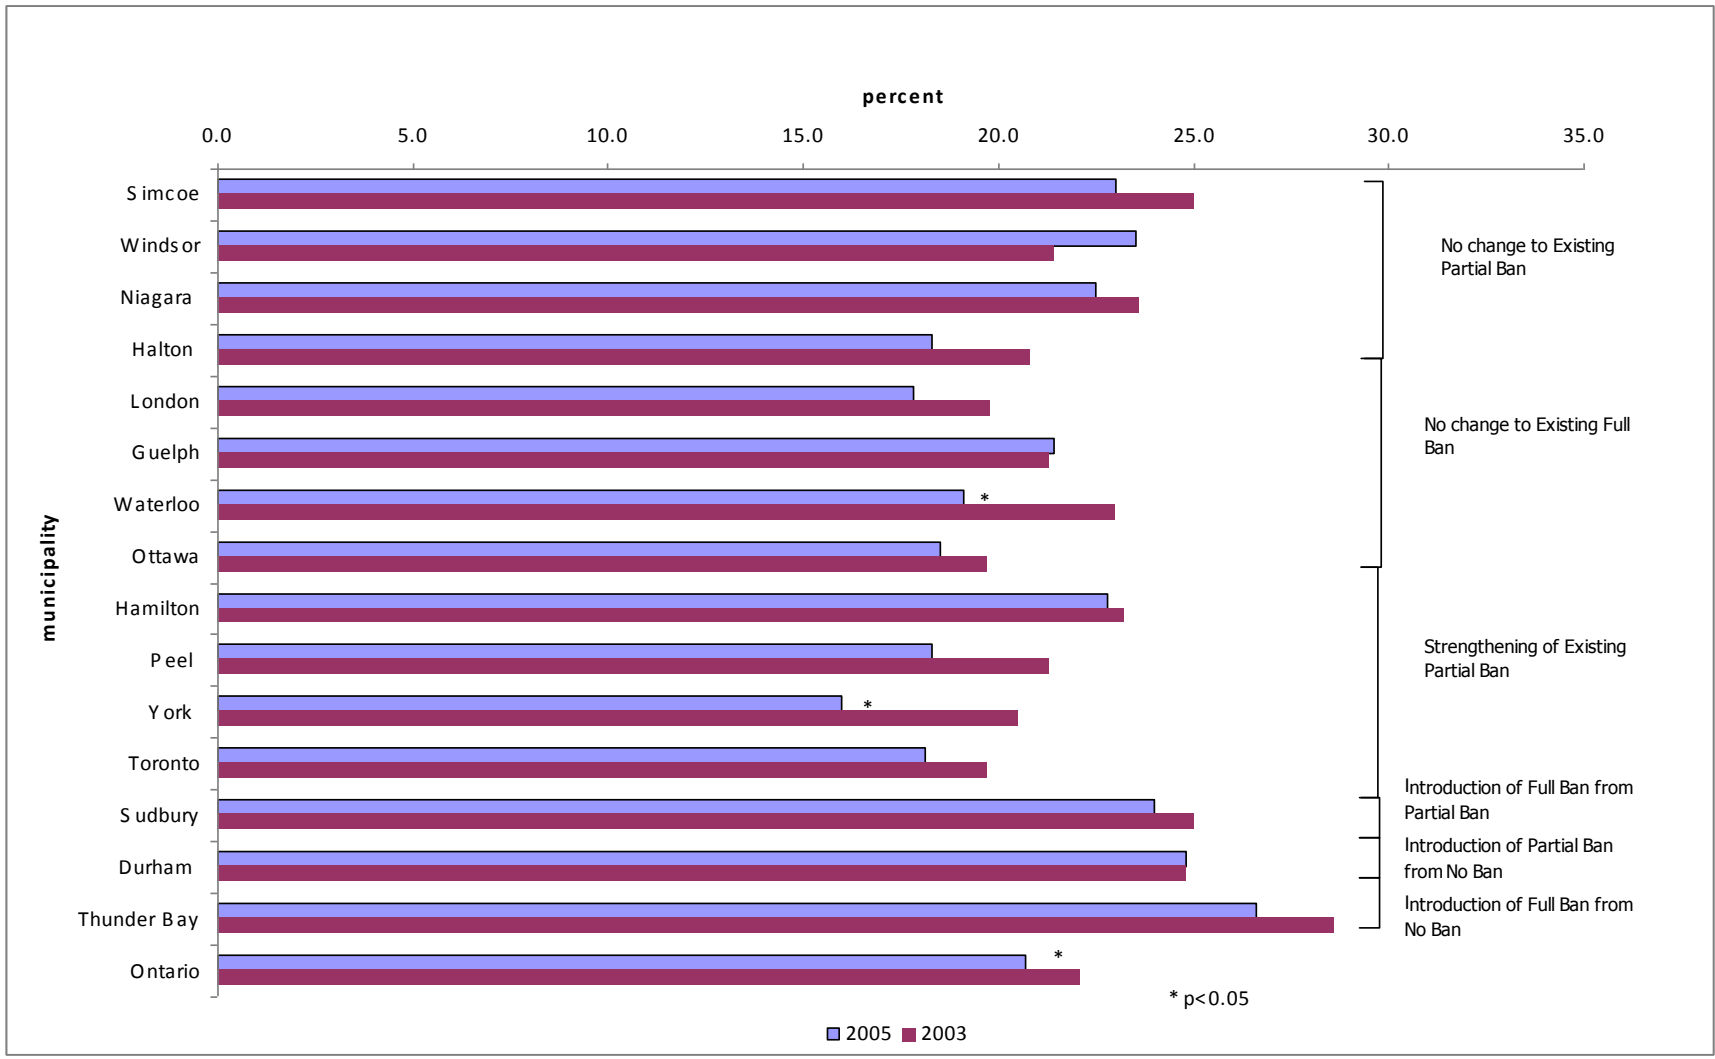

Supplement: MOESM6 [file 9487566]
